# Supplementary material for: Distinct origins and molecular mechanisms contribute to lymphatic formation during cardiac growth and regeneration
Source: eLife. 2019 Nov 8;8:e44153. doi: 10.7554/eLife.44153 (PMC6881115; doi:10.7554/eLife.44153)
Supplement: Figure 1—source data 1. [file elife-44153-fig1-data1.xlsx]

## Sheet: OFT lympahtic development
		prox1a+ sprouts
		Experiment 1																Experiment 2																	Experiment 3
	Age (dpf)/hearts(#)	1	2	3	4	5	6	7	8	9	10	11	12	13	14	15	16	17	18	19	20	21	22	23	24	25	26	27	28	29	30	31	32	33	34	35	36	37	38	39	40	41	42	43	44	45	46	47	48
	21	0	0	0.5	0	1	0	1	1	0.5	1	0.25	0.5	1.5	0	0		2	0	0.5	0	0	0	0	0	0	0	0	0	2	0	0	0		1	1	1	0	0	0	0	1	0	0	1.5	1	1	0	0
	28	0	1	1	1	2	1.5	0.5	0	2	2.5	0.5	0.5	1				0	1	1	2	2.5	3	2.5	2	1	0	3							0	2	0	4	2	1	0	0	0	0	1.5	1	1	0
	34	5	3	3	4	4	6	3	3									3	1	0	4	0	0	2	2.5	2									3	5
											%
					Age (dpf)	21	28	34		Age (dpf)	21	28	34
	0	No prox1a+ sprouts			Bin	Frequency	Frequency	Frequency		Bin	Frequency	Frequency	Frequency
	2	<2 prox1a+ sprouts			0	28	11	3		0	58.3333	28.9474	15.7895
	3	>2 prox1a+ sprouts			2	20	21	3		2	41.6667	55.2632	15.7895
	>3	Interconnected prox1a+ vessels			3	0	5	7		3	0	13.1579	36.8421
					More	0	1	6		More	0	2.63158	31.5789
					n	48	38	19		total	100	100	100
		Lyve1b+ sprouts
		Experiment 1							Experiment 2
	Age (dpf)/hearts(#)	1	2	3	4	5	6	7	8	9	10	11	12	13
	21	0	0	0.5	0	1		2	1.5	0	1.5	1	0.5	1
	28	3	4	3	2	2	2	1	3.5	2.5	0.5	0.5
	34	3	5	4	5	4	5	3.5	5	3	3	4	4	5
											%
	0	No lyve1b+ sprouts			Age (dpf)	21	28	34		Age (dpf)	21	28	34
	2	<2 lyve1b+ sprouts			Bin	Frequency	Frequency	Frequency		Bin	Frequency	Frequency	Frequency
	3	>2 lyve1b+ sprouts			0	4	0	0		0	33.3333	0	0
	>3	Interconnected lyve1b+ vessels			2	8	6	0		2	66.6667	54.5455	0
					3	0	3	3		3	0	27.2727	23.0769
					More	0	2	10		More	0	18.1818	76.9231
					n	12	11	13		total	100	100	100
[truncated: 2 more columns]
