# Supplementary material for: Distinct origins and molecular mechanisms contribute to lymphatic formation during cardiac growth and regeneration
Source: eLife. 2019 Nov 8;8:e44153. doi: 10.7554/eLife.44153 (PMC6881115; doi:10.7554/eLife.44153)
Supplement: Figure 2—figure supplement 1—source data 1. [file elife-44153-fig2-figsupp1-data1.xlsx]

## Sheet: Sheet1
		Heartbeat (bpm)						Avg.
	Age (dpf)/hearts (#)	1	2	3	4	5	6
	6	120	140	132	124	128	128	128.667
	11	160	164	220	188	200		186.4
	15	220	224	208	200			213
	20	204	204	208	220	196		206.4
	24	200	248	200	236	228		222.4
	31	192	168	132				164
	35	132	104	140	144			130
	Heartbeat (bpm)
Treatment/hearts(#)	1	2	3	4	5	6	7	8	9	10	11	12	13	14	15	Avg.	t-test
Control	108	136	114	100	138	114	98	114	108	120	134	110	136	88		115.571
Atenolol	80	92	88	90	86	88	120	76	70	90	70	60	134	112	100	90.4	0.000759946
