# Supplementary material for: Distinct origins and molecular mechanisms contribute to lymphatic formation during cardiac growth and regeneration
Source: eLife. 2019 Nov 8;8:e44153. doi: 10.7554/eLife.44153 (PMC6881115; doi:10.7554/eLife.44153)
Supplement: Figure 2—figure supplement 3—source data 1. [file elife-44153-fig2-figsupp3-data1.xlsx]

## Sheet: Sheet1
	Vessel length measurement using Fiji software plugins
		LFL	MFL	OLV			LFL	MFL	OLV
	WT fish 1	553.216	516.15	589.847		KO fish 1	467.018	370.655	593.79
	WT fish 2	593.518	570.518	619.691		KO fish 2	560.566	530.685	600.974
	WT fish 3	542.646	579.166	639.592		KO fish 3	452.978	356.909	521.07
	WT fish 4	545.506	545.303	562.659		KO fish 4	436.901	441.566	675.026
	WT fish 5	583.417	690.411	582.528		KO fish 5	608.513	577.121	594.982
	WT fish 6	609.757	596.332	620.535		KO fish 6	544.523	551.679	608.629
	WT fish 7	521.494	416.988	552.628		KO fish 7	544.685	509.199	632.51
	WT fish 8	748.106	576.333	671.336		KO fish 8	573.582	373.105	638.394
						KO fish 9	550.358	407.344	636.593
						KO fish 10	551.89	423.187	635.949
						KO fish 11	535.884	474.122	648.93
						KO fish 12	469.043	487.854	569.781
	Average	587.207	561.4	604.852		Average	524.662	458.619	613.052
	SD	71.3637	77.1338	40.2213		SD	54.1824	74.5412	40.9249
	n	8	8	8		n	12	12	12
	SE	25.2309	27.2709	14.2204		SE	15.6411	21.5182	11.814
	Vessel lengths converted to μm (100 μm corresponds to 206 in the Fiji length measurement)
		LFL	MFL	OLV			LFL	MFL	OLV
	WT fish 1	268.551	250.558	286.333		KO fish 1	226.708	179.93	288.248
	WT fish 2	288.116	276.95	300.821		KO fish 2	272.119	257.614	291.735
	WT fish 3	263.42	281.149	310.482		KO fish 3	219.892	173.257	252.947
	WT fish 4	264.809	264.71	273.135		KO fish 4	212.088	214.352	327.683
	WT fish 5	283.212	335.151	282.781		KO fish 5	295.395	280.156	288.826
	WT fish 6	295.999	289.482	301.231		KO fish 6	264.332	267.805	295.451
	WT fish 7	253.152	202.421	268.266		KO fish 7	264.41	247.184	307.044
	WT fish 8	363.158	279.773	325.891		KO fish 8	278.438	181.119	309.9
						KO fish 9	267.164	197.74	309.026
						KO fish 10	267.908	205.431	308.713
						KO fish 11	260.138	230.156	315.015
						KO fish 12	227.691	236.822	276.593
	Average	285.052	272.524	293.617		Average	254.69	222.631	297.598
	SD	34.6426	37.4436	19.5249		SD	26.3022	36.1851	19.8665
	n	8	8	8		n	12	12	12
	SE	12.248	13.2383	6.90309		SE	7.59278	10.4457	5.73496
		LFL	MFL	OLV
	T-test	0.038686	0.00802366	0.663797
