# Supplementary material for: Distinct origins and molecular mechanisms contribute to lymphatic formation during cardiac growth and regeneration
Source: eLife. 2019 Nov 8;8:e44153. doi: 10.7554/eLife.44153 (PMC6881115; doi:10.7554/eLife.44153)
Supplement: Figure 2—source data 1. [file elife-44153-fig2-data1.xlsx]

## Sheet: Sheet1
			prox1a+ sprouts
	Experiment 1																Experiment 2											Experiment 3										Experiment 4
Treatment/hearts(#)	1	2	3	4	5	6	7	8	9	10	11	12	13	14	15	16	17	18	19	20	21	22	23	24	25	26	27	28	29	30	31	32	33	34	35	36	37	38	39	40	41	42	43	44	45	46	47
control			0	1	3	1	0.25	3	4	2	3.5	1	3	1.5	1	1	4	1.5	3	3	0	0	2	0	4	0	1	4	0	2	3.5	1.5	4	3	1.5			4	3	0	4	3	2	3	0.5	2	2
Atenolol	2	3	1	2	2	2.5	1	0	3	2	0.5	1.5	0	0.5	0.5		3	0	0	0	1	0	1.5	0				2	2	1.5	0.5	2	0.5	2	0	4	4	3.5	2	2.5	3	3	0.5	2	0.5	1	1
							control		Atenolol
Bins:	0	No prox1a+ sprouts				Bin	Frequency	Bin	Frequency
	2	<2 prox1a+ sprouts				0	7	0	8
	3	>2 prox1a+ sprouts				2	18	2	25
	>3	Interconnected prox1a+ vessels				3	9	3	7
						More	9	More	3
						Total	43		43
					%		control		Atenolol
						Bin	Frequency	Bin	Frequency
					0		16.2791		18.6047
					2		41.8605		58.1395
					3		20.9302		16.2791
					>3		20.9302		6.97674
						Total	100		100
