# Supplementary material for: Distinct origins and molecular mechanisms contribute to lymphatic formation during cardiac growth and regeneration
Source: eLife. 2019 Nov 8;8:e44153. doi: 10.7554/eLife.44153 (PMC6881115; doi:10.7554/eLife.44153)
Supplement: Figure 2—source data 2. [file elife-44153-fig2-data2.xlsx]

## Sheet: Sheet1
			Fold increase
	Gene	Age (dpf)	Experiment 1	Experiment 2	Experiment 3	Experiment 4	Experiment 5	Avg.	t-test
	klf2a	14	0.702462	1				0.851231
		21	0.763146	1.74587	0.486913	1.10899		1.02623
		28	2.23905	2.09576	1.48567	1.52925		1.83743	0.0313668
		34	1.46806	*0.741142454755152	1.78347	2.46834		1.90662	0.0764266
	klf2b	14	1.19027	1				1.09514
		21	0.971359	1.49112	0.317699	1.1075		0.971921
		28	1.54624	2.00275	0.750439	1.05945		1.33972
		34	0.589258	0.639531	1.47603	1.28821		0.998257
	vegfc	14	1	0.903178	2.12683	1.23886		1.31722
		21	2.97498	2.86187		4.5752		3.47068	0.0127828
		28	5.74011	4.76213		3.57854	3.58635	4.41678	0.00193564
		34	5.72984		5.07232	8.02382	7.08315	6.47728	0.000373303
	cxcl12a	14	1	1.25898	1.20671	0.749427		1.05378
		21	1.12188	0.262893	0.460601	0.941858	2.3597	1.02939	0.956211
		28	1.65565	2.40761	3.32549	2.03731	1.9078	2.26677	0.00984627
		34	4.17794	5.80377		4.22082		4.73418	0.000534516
	cxcl12b	14	1	0.628463	0.831552	1.05926		0.879817
		21	0.947296	0.520097	0.8801	0.804859	1.89935	1.01034	0.653485
		28	1.83662	1.72454	2.02362	2.09377	1.00066	1.73584	0.00860495
		34	3.33633	2.63985	2.31198		2.11375	2.60048	0.000935119
