# Supplementary material for: Distinct origins and molecular mechanisms contribute to lymphatic formation during cardiac growth and regeneration
Source: eLife. 2019 Nov 8;8:e44153. doi: 10.7554/eLife.44153 (PMC6881115; doi:10.7554/eLife.44153)
Supplement: Figure 2—source data 3. [file elife-44153-fig2-data3.xlsx]

## Sheet: Sheet1
	Lymphatic coverage (%)
Genotype/hearts(#)	1	2	3	4	5	6	7	8	9	10	11	12	13	Avg.	t-test
wt	37.5571	29.7326	32.6366											33.3088
flt4-/-	0	0	1.86069	3.32457	7.23059									2.48317	1.52508e-05
wt	30.3778	42.6383	36.5769	42.2527	37.7921	47.0457								39.4472
vegfc+/-	30.678	36.0659	26.4996	35.3115	33.4078	32.7754								32.4564	0.0300971
wt	24.3457	24.7584	23.5569	18.5003										22.7903
vegfd-/-	25.7327	22.289	19.0435	23.65	21.1364									22.3703	0.822898
wt	40.756	30.623	34.2535	46.6546	27.7581	31.957								35.3337
cxcr4a-/-	31.8484	35.1528	28.1762	32.9477	34.8635	32.381								32.5616	0.38689
wt	49.0467	43.4631	41.7135	50.0672
cxcl12b-/-	42.8608	51.0306	43.1846	47.4559	43.4386	72.6555	63.3521	38.1182	38.9306	26.9545				46.7981	0.0691946
	Sprouts (#)
Genotype/hearts(#)	1	2	3	4	5	6	7	8	9	10	11	12	13	Avg.	t-test
wt	7	7	8											7.33333
flt4-/-	0	0	1	2	1									0.8	2.27199e-05
wt	9	15	16	6	15	10	14	6						11.375
vegfc+/-	5	2	4	9	5	7								5.33333	0.00803162
wt	11	10	7	11										9.75
vegfd-/-	10	7	12	5	13									9.4	0.858816
wt	11	10	8	11										10
cxcr4a-/-	1	8	10	4	4	7	11	2	5	4				5.6	0.0268352
wt	13	10	11	11										11.25
cxcl12b-/-	7	13	12	13	7	8	10	14						10.5	0.635443
	Loops (#)
Genotype/hearts(#)	1	2	3	4	5	6	7	8	9	10	11	12	13	Avg.	t-test
wt	6	10	4											6.66667
flt4-/-	0	0	0	0	0									0	0.00206337
wt	11	12	9	8	20	21	14	8						12.875
vegfc+/-	2	2	2	5	1	2								2.33333	0.000396881
wt	5	4	5	5										4.75
vegfd-/-	3	8	5	5	3									4.8	0.96377
wt	12	5	7	5										7.25
cxcr4a-/-	3	1	6	2	5	2	5	3						3.375	7.07431e-05
wt	17	11	15	6										12.25
cxcl12b-/-	8	5	8	6	8	20	7	22						10.5	0.650632
