# Supplementary material for: Distinct origins and molecular mechanisms contribute to lymphatic formation during cardiac growth and regeneration
Source: eLife. 2019 Nov 8;8:e44153. doi: 10.7554/eLife.44153 (PMC6881115; doi:10.7554/eLife.44153)
Supplement: Figure 3—figure supplement 1—source data 1. [file elife-44153-fig3-figsupp1-data1.xlsx]

## Sheet: Sheet1
	Genotype/hearts(#)	1	2	3	4	5	6	7	8	9	10	11		Avg.	t-test
Ventricle size (fold change)	vegfaa (Veh)	1.29989	0.809549	1.02721	0.816961	0.742103	0.528406	1.23422	1.1603	1.38136				1
	vegfaa (Tam)	1.2587	1.27262	1.57049	1.54494	0.629012	1.11498	1.46488	1.2614	1.44339	1.98638			1.35468	0.0291889
Ventricle size (fold change)	wt	0.820892	1.13088	0.866971	1.18126									1
	cxcr4a	0.87657	1.11937	1.31474	1.36895									1.16991	0.282801
Lymphatic sprouts (#)	wt	11	10	12	10									10.75
	cxcr4a	0	1	2	3									1.5	2.584e-05
Ventricle size (fold change)	wt	0.798146	0.677036	0.975111	1.54971	0.793536	0.781182	1.03763	1.25149	1.13616				1
	flt4	1.01414	1.17538	1.47297	1.37817	0.891101	1.57094	1.33585	1.36977					1.27604	0.0436037
Ventricle size (fold change)	wt	0.781499	1.30831	0.910196										1
	vegfc	0.894863	0.92315	1.10689	0.828434	0.844298								0.919526	0.568749
Ventricle size (fold change)	vegfaa (Veh)	1.09259	1.10665	0.897646	0.710759	1.19236								1
	vegfaa;vegfc (Veh)	1.26711	1.64115	0.807544	0.7749	0.756091								1.04936
	vegfaa (Tam)	1.30341	1.22844	1.40311	1.23451	1.52108	0.959406	1.52472	1.48117	1.07798	1.37632	1.37989		1.31728	0.00661478
	vegfaa;vegfc (Tam)	1.40553	1.20896	1.35608	1.02571	1.29187	1.15063	1.20173	0.979988	1.15995	1.31507			1.20955	0.0224816
Major blood vessels (#)	wt	3	2	3	2	2								2.4
	flt4	2	2	3	2	3	2							2.33333	0.840228
Major blood vessels (#)	wt	3	3	2										2.66667
	vegfc	3	2	2	3	2								2.4	0.536963
