# Supplementary material for: Distinct origins and molecular mechanisms contribute to lymphatic formation during cardiac growth and regeneration
Source: eLife. 2019 Nov 8;8:e44153. doi: 10.7554/eLife.44153 (PMC6881115; doi:10.7554/eLife.44153)
Supplement: Figure 3—source data 1. [file elife-44153-fig3-data1.xlsx]

## Sheet: Sheet1
	Treatment/hearts(#)	1	2	3	4	5	6	7	8	9	10	11	12	13	14	15	16	17	18	19	20	21	22	23	Avg.	t-test
Ventricle size (normalized to control)	Control	0.897809	0.546709	0.912069	1.10822	1.40179	0.873927	1.15986	1.09962	0.429704	1.27767	0.0566932	1.83397	0.166291	2.10518	1.02971	1.10078	0.158284	1.34859	1.49312	0.473164	0.154496	1.48845	1.88389	1
	PHZ	1.54233	1.88438	1.27269	1.75535	2.15006	2.08929	1.28619	2.43404	3.09445	2.00718	3.52279	1.88372	2.77411	2.26394	2.2365	2.47062	0.681116	3.44466	2.76824					2.18746	7.96724e-07
Blood vessel length (normalized to control)	Control	0.820354	0.809789	0.253355	1.6552	0.435999	1.68863	1.33667	0.130898	1.84158	1.02753	0.687518	0.451397	1.45133	1.40975	0.727104	0.551765	1.37126	0.907655	1.13389	1.55872	0.749606			1
	PHZ	4.08843	2.08994	6.48536	4.64901	3.91142	8.81369	2.6976	10.5681	1.03518	5.06879	1.8983	2.09322	1.5908	1.59621	3.30359									3.99264	2.69634e-05
Lymphatic vessel length (normalized to control)	Control	0.021132	0.0211321	0.021132	3.31074	0.021132	3.58359	0.021132	1	1	1	0.0646082	0.064608	0.064608	3.80618	0.665749	0.00361	0.00361	1.81635	1.77731	1.38976	1.34361			1
	PHZ	9.58251	0.0211321	12.4691	3.321	19.2139	42.9658	4.30058	8.65669	9.13349	4.86667	0.0646082	2.28884	0.895001	0.00361	20.4774									9.21736	0.0023387
