# Supplementary material for: Distinct origins and molecular mechanisms contribute to lymphatic formation during cardiac growth and regeneration
Source: eLife. 2019 Nov 8;8:e44153. doi: 10.7554/eLife.44153 (PMC6881115; doi:10.7554/eLife.44153)
Supplement: Figure 3—source data 2. [file elife-44153-fig3-data2.xlsx]

## Sheet: Sheet1
	Genotype/hearts(#)	1	2	3	4	5	6	7	8	9	10	11		Avg.	t-test
Blood vessel coverage (%)	vegfaa (Veh)	36.5263	20.177	22.8816	45.5977	40.4545	7.76501	30.364	32.1743	30.2822				29.5803
	vegfaa (Tam)	51.7876	45.299	41.7763	45.2199	37.8731	38.5558	49.7167	44.6738	45.8783	46.9931	49.0899		45.1694	0.000548543
Lymphatic vessel coverage (%)	vegfaa (Veh)	7.54536	3.80907	4.86143	6.65678	8.25628	0.10182	15.7305	6.09102	21.402				8.27269
	vegfaa (Tam)	33.11	37.7388	43.7168	37.2122	41.0811	47.6283	41.7379	32.4097	43.5961	53.1429			41.1374	3.12038e-09
Blood vessel coverage (%)	wt	38.4743	34.9568	18.2469	31.1083	31.722								30.9017
	cxcr4a	33.4644	39.9185	30.4945	27.4592									32.8342	0.682659
Lymphatic vessel length (normalized to control)	wt	9.8362	6.67992	11.8998	11.5841									10
	cxcr4a	0	0.360315	2.08412	3.45047									1.47373	0.00103134
Blood vessel coverage (%)	wt	40.2831	40.9179	46.0451	44.1263	44.4446								43.1634
	flt4	35.8613	37.0582	35.6395	42.4647	40.2637	37.9696							38.2095	0.0114124
Lymphatic vessel length (normalized to control)	wt	9.70819	17.1829	6.04071	13.3781	3.69009								10
	flt4	0	0	0	0	0								0	0.00340553
Lymphatic sprouts (#)	wt	8	15	10	13	3								9.8
	flt4	0	0	0	0	0	0							0	0.000555558
Blood vessel coverage (%)	wt	41.5449	35.4854	37.8791										38.3031
	vegfc	40.0259	33.3178	35.4187	39.6785	35.2093								36.73	0.499207
Lymphatic vessel length (normalized to control)	wt	5.35217	12.1335	12.5143										10
	vegfc	0	0.994311	1.34097	0.933236	1.43364								0.940432	0.00195866
Lymphatic sprouts (#)	wt	9	20	17										15.3333
	vegfc	0	2	3	3	6								2.8	0.00368674
Blood vessel coverage (%)	vegfaa (Veh)	34.0421	12.1195	17.2853										21.149
	vegfaa;vegfc (Veh)	24.732	29.2469	17.7482										23.909
	vegfaa (Tam)	38.7111	50.2872	48.8925										45.9636	0.030384
	vegfaa;vegfc (Tam)	56.4757	49.0732	72.5173	45.532									55.8995	0.008504
Lymphatic vessel coverage (%)	vegfaa (Veh)	0	0	0	0	0.765277								0.153055
	vegfaa;vegfc (Veh)	0	0	0	0	0								0
	vegfaa (Tam)	33.0267	15.0102	7.49123	3.24067	22.4586	8.11585	18.3699	2.24834	5.58257	15.4418	6.90732	13.0986	12.5357	0.00826785
	vegfaa;vegfc (Tam)	0	0	0	0	0	0	0	0	0	0	0.715312		0.0650283	0.000147849
