# Supplementary material for: Distinct origins and molecular mechanisms contribute to lymphatic formation during cardiac growth and regeneration
Source: eLife. 2019 Nov 8;8:e44153. doi: 10.7554/eLife.44153 (PMC6881115; doi:10.7554/eLife.44153)
Supplement: Figure 4—source data 1. [file elife-44153-fig4-data1.xlsx]

## Sheet: Sheet1
	flt4+/prox1a+ LEC clusters (#)
size (mm)/hearts(#)	1	2	3	4	5	6	7	8	Avg.
14-19	0	0	0	0	0				0
20-22	0	0	0		0	0	0	2	0.285714
23-25	2	2	0	1	2				1.4
		1	2	3	4	5	6	7	8	Avg.	t-test
lyve1b+ LEC clusters (#)	vegfaa (Veh)	0	0	0	0	0	0	0		0
	vegfaa (Tam)	0	0	0	0	0	0	0	0	0
lyve1b+ LEC clusters (#)	wt	2	1	2	0	1				1.2
	flt4	0	0	0	0	0	0			0	0.00618733
lyve1b+ LEC clusters (#)	wt	3	2	6						3.66667
	vegfc	0	0	1	0	2				0.6	0.0244487
lyve1b+ LEC clusters (#)	wt (20-22mm)	0	0	0	1	0	0	1	3	0.625
	wt (23-28mm)	2	5	1	0	0	0	3		1.57143
	cxcr4a (20-22mm)	0	1	0	0	1	0.4			0.4	0.640495
	cxcr4a (23-28mm)	7	4	1	0	0	2	0	0	1.75	0.881721
lyve1b+ LEC clusters (#)	Control	0	0	0	0	0	0	0	0	0
	PHZ	0	0	0	0	0	0	0	0	0
