# Supplementary material for: Distinct origins and molecular mechanisms contribute to lymphatic formation during cardiac growth and regeneration
Source: eLife. 2019 Nov 8;8:e44153. doi: 10.7554/eLife.44153 (PMC6881115; doi:10.7554/eLife.44153)
Supplement: Figure 5—source data 1. [file elife-44153-fig5-data1.xlsx]

## Sheet: Sheet1
	mTmG labeled cells (%)
Heart:	1	2	3	4	5	6	Avg.
Erg+ cells (D)	0.90566	1	0.866667	0.851852	0.828283		0.890492
Prox+ clusters (D)	0.432432	0.568627	0.0151515	0.0333333	0.038961		0.217701
Prox+ vessels (D)	0.511628	0.521739	0.119508	0.0699088	0.0564103		0.255839
Prox+ clusters (V)	0.396825	0	0	0.368421	0.1875	0.0555556	0.16805
Prox+ vessels (V)	0.405917	0.284091	0.324201	0.247987	0.449704	0.399371	0.351879
