# Supplementary material for: Distinct origins and molecular mechanisms contribute to lymphatic formation during cardiac growth and regeneration
Source: eLife. 2019 Nov 8;8:e44153. doi: 10.7554/eLife.44153 (PMC6881115; doi:10.7554/eLife.44153)
Supplement: Figure 6—source data 1. [file elife-44153-fig6-data1.xlsx]

## Sheet: Sheet1
		Lymphatic coverage (%)
	hearts#	1	2	3	4	5	6	Avg.	t-test
	Uninjured area	4.65679	2.70603	3.00375	0.845903	2.16502	0.112449	2.24832
	Injured area	16.12	12.6142	8.02094	19.5467	17.3592	9.04202	13.7838	0.000190585
