# Supplementary material for: Distinct origins and molecular mechanisms contribute to lymphatic formation during cardiac growth and regeneration
Source: eLife. 2019 Nov 8;8:e44153. doi: 10.7554/eLife.44153 (PMC6881115; doi:10.7554/eLife.44153)
Supplement: Figure 7—source data 1. [file elife-44153-fig7-data1.xlsx]

## Sheet: Sheet1
hearts#	1	2	3	4	5	6	7	8	9	10	11	12	Avg.	t-test
Lymphatic vessel coverage (relative to wt)	wt (65dpi)	2.2627	0.538968	0.770547	0.769096	1.97583	1.5236	0.507355	1.15255	0.249679	0.249679		1
	vegfc (65dpi)	0.0335358	0.449663	0.0214744	0.115655	0.161319	0.116329	0.215874	0.126788	0.605702	0.00824899		0.185459	0.00255493
Scar area (%)	wt (65dpi)	2.14003	0	0	0	0	0						0.356672
	vegfc (65dpi)	10.2735	10.7169	9.27221									10.0875	7.55146e-07
Lymphatic vessel coverage (relative to wt)	wt (36dpi)	1.32296	0.944735	0.732302									1
	flt4(36dpi)	0.0208703	0.0394541	0.0106807	0.0045884	0.0045884	0.00810259	0.00575468	0.00662939				0.0125836	2.7694e-06
Scar area (%)	wt (36dpi)	1.51141	6.76091	6.70095	9.61592	0	0.87	0					3.63703
	flt4(36dpi)	16.3803	16.0891	6.35932	7.03369	0	10.0471	25.5885	19.5175	0	12.6262	17.5847	11.9297	0.0234634
Lymphatic vessel coverage (relative to wt)	wt (29dpi)	1.21822	0.738003	0.964656	1.07912								1
	cxcr4a(29dpi)	1.97678	0.862322	1.2166	2.39553	0.965499							1.48335	0.211749
Scar area (%)	wt (77dpi)	3.82199	0	0	0	4.50204							1.66481
	cxcr4a(77dpi)	13.9792	7.08536	6.01638	6.18538	9.92744							8.63874	0.00505839
